# Supplementary material for: Identification of a nucleoside analog active against adenosine kinase–expressing plasma cell malignancies
Source: JCI journal article supplement (doi:10.1172/jci83936), 2017-05-14
Supplement: sd1 [file 1]

## **SUPPLEMENTAL METHODS**

### **Cell lines and culture conditions**

KSHV+ primary effusion lymphoma (PEL) cell lines (BC1, BC2, BC3, BC5, BCBL1, BCP1), EBV+ lymphoblastoid cell line LCL9001, EBV+ diffuse large B-cell lymphomas (DLBCL) with immunoblastic features (IBL1, IBL4), and EBV+ effusion DLBCL BCKN1 were cultured in RPMI-1640 medium (Invitrogen) supplemented with 50µg/mL Gentamicin (Sigma-Aldrich) and 10% or 20% heat-inactivated fetal bovine serum, respectively. Uninfected DLBCL cell lines (Ly2, Ly7) were cultured in IMDM (Invitrogen) supplemented with 50µg/mL Gentamicin and 10% FBS. Multiple myeloma (MM) cell lines U266 and MM1S were cultured in RPMI supplemented with 15%FBS and 50µg/mL Gentamicin, while JJN3 was cultured in 40%IMDM /40% DMEM plus 20% FBS supplemented with 50µg/mL Gentamicin. Hodgkin's lymphoma (L428, L1236) and Burkitt's lymphoma cell lines (BJAB, Namalwa) were maintained in RPMI-1640 supplemented with Gentamicin and 10% FBS. All of the PEL cell lines and IBL1 were established in our laboratory from lymphomatous effusions except BCBL1, which was obtained from the AIDS and Cancer Specimen Bank. Burkitt lymphoma cell lines Namalwa and BJAB as well as the multiple myeloma cell line U266 were obtained from the American Type Culture Collection (ATCC). JJN3 cell line and Hodgkin cell lines (L428, L1236) were obtained from DSMZ. DLBCL cell lines LY2 and LY7 were provided by Riccardo Dalla-Favera (Columbia University). MM1S cell line was provided by Dr. Giorgio Inghirami lab at Weill Cornell Medicine. Human CAG MM cell line stably expressing the HSV-TK-eGFP luciferase fusion protein was kindly provided by Malcolm Moore (Memorial Sloan-Kettering Cancer Institute) and was cultured in RPMI +20%

FBS. All cell lines were maintained in a humidified incubator at 37°C and 5% CO<sub>2</sub>.

The xenograft cell line BC3NF $\kappa$ B-luc#6 was generated as previously described(1). The double reporter cell line BC3NFRen-luc#3 was generated by transduction of this cell line using a lentiviral construct expressing renilla luciferase controlled by a constitutive promoter (retroviral LTR). These cells were maintained in RPMI-1640 supplemented with 15% FBS and 50 $\mu$ g/mL Gentamicin, as well as 1.2mg/mL Geneticin (Life Technologies) to maintain clonal selection.

Bone marrow specimens were obtained from multiple myeloma patients at the New York–Presbyterian Hospital under informed consent as part of an Institutional Review Board-approved study in accordance with the Declaration of Helsinki. Primary CD138<sup>+</sup> human myeloma cells were isolated by Ficoll-Hypaque density gradient centrifugation. The CD138<sup>+</sup> bone marrow myeloma cells were then enriched from this fraction to >95% purity using an automated MACS CD138 MicroBeads system (Miltyen Biotechnology, Inc., Auburn, CA). Coculturing CD138<sup>+</sup> cells with HS5 stromal cells did not alter their sensitivity to 6-ETI treatment for short treatment course. PBLs were harvested from normal blood using Ficoll-Paque (Sigma-Aldrich) as described previously. Cells were plated in RPMI-1640 supplemented with 20% FBS.

Pancreatic adenocarcinoma PA-Tu-8988T cell line was kindly provided by Lewis Cantley's lab (Weill Cornell Medicine). Knock out of ADK in this cell line was achieved by transducing these cells with ADK shRNA Lentiviral Particles (Santa cruz) and selecting the stable cell line using 2 $\mu$ g/ml Puromycin.

## **Cell cycle assays**

BC3 cells in the exponential phase were seeded at a cell density of  $2 \times 10^5$  cells/mL. Cells were treated with 0.1% DMSO or with 6-ETI at a final concentration of  $1 \mu\text{M}$  6-ETI for 24hrs for cell cycle. Post-treatment, cells were harvested, fixed and stained in Propidium Iodide (Roche). Subsequently, stained cells were analyzed by flow cytometry using BD FACS Aria II SORP cell sorter, and phases of the cell cycle modeled using FlowJo v7.6.5.

## **Apoptosis assays**

BC3 and IBL1 cells in the exponential phase were seeded at a cell density of 0.2 million cells/ml. Cells were treated with 0.1% DMSO or with 6-ETI at a final concentration of 500nM or  $5 \mu\text{M}$  for 24, 48 or 72hrs. Post-treatment, cells were harvested and stained with  $2.5 \mu\text{L}$  of Alexa Fluor 647 Annexin V conjugate (Life technologies) and  $2.5 \mu\text{L}$  of 7-AAD (BD biosciences) and incubated for 15 minutes in the dark at room temperature. Subsequently,  $200 \mu\text{L}$  of Annexin V binding buffer (BD Biosciences) was added to the cell suspension and cells analyzed by flow cytometry using BD biosciences LSR II machine.

## **Toxicity on normal primary tonsillar lymphocytes**

Primary human tonsil specimens were obtained from the Weill Cornell/New York Presbyterian Institutional Biobank. Lymphocytes were isolated from human tonsil tissue by dissection and maceration in RPMI media. Lymphocyte-containing media was passed through a  $70 \mu\text{m}$  filter and pelleted at 400g for 7 minutes. RBC were lysed for 5 minutes in RBC lysing solution ( $0.15\text{M}$  ammonium chloride,  $10\text{mM}$  potassium

bicarbonate, 0.1M EDTA). After dilution to 50ml with RPMI, lymphocytes were filtered through a 0.4µm filter, counted and pelleted a second time. Total B cells were isolated using magnetic cell sorting according to manufacturer instructions (Miltenyi Cat#130-091-151). Cells were plated at 2 million cells/ml in RPMI with 20% FBS and 100µg/ml Primocin (Invivogen) and laid over gamma-irradiated CDW32 feeder cells. Cells were then treated with DMSO, 1µM or 10µM 6-ETI for 24hrs. For the multi-color flow cytometry immunophenotyping, cells were pelleted and resuspended in FACS Wash buffer (PBS+0.5%FBS+0.1%Sodium Azide) containing B cell phenotype panel as follows for 15 minutes on ice: CD19-PE (16µl), CD38-PECy7 (6µl, BD Cat#560667), IgD-PerCP Cy5.5 (5µl, BD Cat#561315), CD138-APC (5µl, BD Cat#347207), CD27-APC H7 (5µl BD Cat#560222). Volumes indicated were based on titrating the individual antibodies on primary tonsil lymphocyte specimens. After incubation, 100µl FACS Wash was added and pelleted lymphocytes were washed with a further 200µl of FACS Wash prior to being resuspended in 200µl FACS Wash for analysis. Data was acquired on a BD LSR2 Flow Cytometer and analyzed using FlowJo software. The frequency of plasma cells was assessed based on singlet-gated cells expressing CD138.

### **6-ETI effects on DNA synthesis using EdU click-IT assay**

BC3 and U266 cells were seeded at a density of 0.5 million cells /ml and treated with DMSO only, 1µM or 10µM 6-ETI for BC3 cells and 5µM 6-ETI for U266 cells for 24hrs. At 24hrs post 6-ETI treatment, 0.5 million cells of each of the treated conditions were labeled with 10µM of EdU for 2 hours then fixed for 30min using 2% paraformaldehyde supplemented with 0.3M sucrose. Cells were then washed in PBS and permeabilized with 0.2% saponin, PBS with 1%BSA and 0.3M sucrose for 20 min at



room temperature. During this incubation time, a click-iT cocktail mix containing click iT reaction buffer,  $\text{CuSO}_4$ , alexafluor488 and click iT reaction buffer additive was prepared according to the manufacturer's instructions. Cells were washed in PBS after permeabilization and the click-iT cocktail mix was added for 30 min at room temperature in the absence of light. To visualize DNA, cells were counterstained with Hoechst (1:1000) for another 30 min then washed and resuspended in PBS with 1% BSA. 20  $\mu\text{l}$  of the resuspended cells were combined with 20  $\mu\text{l}$  of mounting media Fluoromount-G (Southern biotech) and cells were mounted on Ibidi  $\mu$ -slides. Cells were imaged using DeltaVision image restoration microscope (Rockefeller center).

### **Immunofluorescence staining, image acquisition and analysis**

$1 \times 10^5$  treated cells were pelleted into a 96-well round bottom plate. Cells were washed once with PBS, and fixed in PBS+2% paraformaldehyde+0.03M sucrose for 15 min at room temperature. Cells were then washed twice with PBS+1% BSA+0.03M sucrose, permeabilized with PBS+0.2% saponin+1% BSA+0.03M sucrose (IFA Wash) for 15 min at room temperature, and blocked for 1 hour in PBS+5% normal goat serum. Cells were then stained in IFA Wash containing phospho-histone-H2A.X (ser139) antibody ( $\gamma$ -H2AX) at 1:100 dilution overnight at 4°C. Following two washes with PBS+1% BSA+0.03M sucrose, cells were re-permeabilized and re-blocked as above prior to incubation for 1 hour at room temperature with anti-rabbit-AlexaFluor594+Hoechst diluted 1:1000 in IFA Wash. Cells were then washed twice with PBS+1% BSA+0.03M sucrose, resuspended in 30  $\mu\text{l}$  Fluoromount-G (Southern Biotech) and transferred to 16-well Ibidi  $\mu$ -slides for imaging. Images were taken on an Applied Precision Deltavision Image Restoration Microscope using Softworx analysis software.

Z-stacks with a 0.2 $\mu$ m step size were taken at 100x magnification. Stacks were subjected to deconvolution analysis and projections were made superimposing 5 representative z-planes to generate the final image.

### **6-ETI synthesis**

A mixture of ethanethiol (26g, 419mmol), methanol (16ml), and sodium hydroxide (6.7ml, 20% aqueous solution) was cooled to 0°C, using an ice water bath. The mixture was stirred for 30 minutes, at which point 6-chloropurine riboside (2g, 7mmol) was added. The resulting solution was slowly warmed to ambient temperature and stirred for 12 hours, then was neutralized with glacial acetic acid (2.4ml). Solvent was then removed using rotary evaporator; a small amount of bleach was placed in the solvent trap to quench any remaining ethanethiol. The resulting crude product was dissolved in acetone (100mL) and then passed through a short Celite plug to remove minor impurities. Concentration *in vacuo* provided 6-ETI as a white powder (2.11g, 6.7mmol, 96%). <sup>1</sup>H NMR (500 MHz, CD<sub>3</sub>OD)  $\delta$  8.69 (s, 1H), 8.59 (s, 1H), 6.09 (d, *J* = 5.8 Hz, 1H), 4.75 (dd, *J* = 5.5, 5.4 Hz, 1H), 4.37 (dd, *J* = 5.1, 3.3 Hz, 1H), 4.18 (dd, *J* = 6.2, 3.1 Hz, 1H), 3.91 (dd, *J* = 12.4, 2.9 Hz, 1H), 3.78 (dd, *J* = 12.4, 3.1 Hz, 1H), 3.42 (q, *J* = 7.4 Hz, 2H), 1.45 (t, *J* = 7.4 Hz, 3H).

### **Microplate-based NF- $\kappa$ B inhibition assay**

Exponentially growing BC3-derived reporter cell lines (BC3NF $\kappa$ B-luc#6 or BC3NFRen-luc#3), and unrelated luciferase expressing U251-pGL3 cells were resuspended in respective RPMI-1640 complete media, and plated in a 96-well tissue culture microplate at 7.5\*10<sup>5</sup> cells/mL and 3\*10<sup>5</sup> cells/mL, respectively, in the presence or absence of

varying concentrations of test compounds. After 24 hours of incubation, the luciferase activity was measured using Steady-Glo Luciferase Assay System or Dual-Glo Luciferase assay system (Promega, Madison, WI), according to the manufacturer's instructions.

### **Lytic reactivation qRT-PCR and flow**

BC3 cells in the exponential phase were plated at  $2 \times 10^5$  cells/mL, and treated with 100nM, 1 $\mu$ M, or 10 $\mu$ M 6-ETI for 6, 24, or 48 hours. Expression of viral latent and lytic genes was determined using qRT-PCR as previously described (2).

Lytic reactivation flow was performed as previously described (2). JSC1 B3.1 cells in the exponential phase were seeded at  $2 \times 10^5$  cells/mL and treated with 1 or 10 $\mu$ M 6-ETI for 24 or 48 hours, or 20ng/mL lytic inducer TPA for 48 hours.

### ***In vivo* xenograft model of EBV-associated immunoblastic lymphoma**

The *in vivo* xenograft model of EBV-associated immunoblastic lymphoma was generated by injecting NOD-SCID mice (obtained from Jackson Laboratory Stock# 001303) subcutaneously on the flank region with  $5 \times 10^6$  IBL-1 cells in 200 $\mu$ l of 50:50 matrigel/ cell suspension per mouse. After forming palpable or measurable tumors, mice were randomly grouped (n=3 per group) and treated intraperitoneally with vehicle PBS-Tween80 or 6-ETI (300mg/kg/day) for 5 treatments over the course of 10 days where drug was administered three times a week. Tumor size was assessed by caliper measurement three times a week, and tumor volume (V) was calculated using the formula  $V = (\text{length} \times \text{Width}^2)/2$  where L= length or largest tumor diameter and

W=width or the perpendicular tumor diameter. Relative tumor volume was determined according to the formula  $V_d/V_0$  where  $V_d$  is tumor volume on the day of measurement, and  $V_0$  represents the tumor volume on day 0 when the treatment started. At the end of the treatment course, two of the control mice were treated with vehicle PBS-Tween80 or 6-ETI (300mg/kg) for 24hr after which the tumors were harvested, fixed in 10% formalin and embedded in paraffin for histological examination and immunohistochemistry.

### **Immunohistochemistry**

Cases were collected from New York Presbyterian Hospital–Weill Cornell, and obtained with the approval and according to guidelines of the institutional review board. Primary cases used for immunohistochemistry included two primary effusion lymphomas, one extracavitary primary effusion lymphoma, two multiple myelomas, and two plasmablastic lymphomas. Immunohistochemical staining of ADK (Polyclonal Rabbit antibody, dilution 1:25, Sigma) was accomplished using the Bond III Autostainer (Leica Microsystems, Illinois, USA). Formalin fixed and paraffin-embedded tissue sections were first baked and deparaffinized. Antigen retrieval was then followed by heating the slides in Bond Epitope Retrieval Solution 1(ER1) (Leica Microsystems) at 99-100°C for 30 minutes. Sections were then incubated sequentially with the primary antibody, post-primary (equivalent to secondary antibody), polymer (equivalent to tertiary antibody), endogenous peroxidase block, diaminobenzidine (DAB) and hematoxylin for 15, 8, 8, 5, 10 and 5 minutes (Bond Polymer Refine Detection; Leica Microsystems), respectively. Finally the sections were dehydrated in 100% ethanol, and mounted in Cytoseal™ XYL (Richard-Allan Scientific, Kalamazoo, MI). Immunohistochemical staining of Cleaved Caspase 3 (Polyclonal Rabbit antibody, dilution 1:300, Cell Signaling) was

accomplished as above, and used to assess apoptosis *in vivo* in mice with IBL1 xenografts treated with 6-ETI.

### **RNA sequencing data analysis**

To search for single nucleotide variants (SNVs) and small indels in the human genome, raw data was mapped to human reference GRCh37 using Bowtie2 via Tophat2 v.2.0.11 (3) and each tumor sample was compared against the two normal BC3 samples using Strelka v.1.0.10 (4). Putative variants were annotated using snpEff v.3.3. Annotated variants were examined with a combination of custom shell scripts and manual visualization in Integrative Genomics Viewer (IGV) (5) to identify candidates that were 1) present in tumor samples but in neither of the normal samples; 2) of a type that was likely to affect the protein (non-synonymous, start codon loss, stop codon gain, frame shift); and 3) recurrent in the tumor samples. Once candidates were identified, expression (or lack thereof) across each of the exons and introns of the candidate was checked with HTSeq-counts v.0.6.1 (6) and visualization in IGV. To search for variants in the KSHV genome, Bowtie2 was used to map the raw data to genomic reference NC\_009333.1. SNVs and small indels in characterized viral domains were detected using a combination of Strelka v.1.0.10 and Samtools mpileup v.0.1.18(7), and annotated in snpEff v.4.0E using a database constructed around the Genbank record. No recurrent variants survived filtration for minimum read depth of 10 and a variant type likely to affect the structure of the protein. Samples were searched for differential expression using HTSeq-counts v.0.6.1 and applying EdgeR v.3.6.7 (8) using the exact negative binomial test on gene counts normalized by the trimmed mean of M-values (TMM) method of tumor samples compared to BC3 normal samples. Gene expression

data from RNA sequencing was analyzed using Ingenuity Pathway Analysis software (Ingenuity® Systems, [www.ingenuity.com](http://www.ingenuity.com)).

## References:

1. Keller SA, Hernandez-Hopkins D, Vider J, Ponomarev V, Hyjek E, Schattner EJ, and Cesarman E. NF-kappaB is essential for the progression of KSHV- and EBV-infected lymphomas in vivo. *Blood*. 2006;107(8):3295-302.
2. Nayar U, Lu P, Goldstein RL, Vider J, Ballon G, Rodina A, Taldone T, Erdjument-Bromage H, Chomet M, Blasberg R, et al. Targeting the Hsp90-associated viral oncoproteome in gammaherpesvirus-associated malignancies. *Blood*. 2013;122(16):2837-47.
3. Saunders CT, Wong WS, Swamy S, Becq J, Murray LJ, and Cheetham RK. Strelka: accurate somatic small-variant calling from sequenced tumor-normal sample pairs. *Bioinformatics*. 2012;28(14):1811-7.
4. Thorvaldsdottir H, Robinson JT, and Mesirov JP. Integrative Genomics Viewer (IGV): high-performance genomics data visualization and exploration. *Brief Bioinform*. 2013;14(2):178-92.
5. Robinson JT, Thorvaldsdottir H, Winckler W, Guttman M, Lander ES, Getz G, and Mesirov JP. Integrative genomics viewer. *Nature biotechnology*. 2011;29(1):24-6.
6. Li H, Handsaker B, Wysoker A, Fennell T, Ruan J, Homer N, Marth G, Abecasis G, and Durbin R. The Sequence Alignment/Map format and SAMtools. *Bioinformatics*. 2009;25(16):2078-9.
7. Robinson MD, McCarthy DJ, and Smyth GK. edgeR: a Bioconductor package for differential expression analysis of digital gene expression data. *Bioinformatics*. 2010;26(1):139-40.
8. Mathews, II, Erion MD, and Ealick SE. Structure of human adenosine kinase at 1.5 Å resolution. *Biochemistry*. 1998;37(45):15607-20.

**Supplemental Table 1.** Small molecule screening data

| <b>Category</b>   | <b>Parameter</b>                         | <b>Description</b>                                                                                                                                                                                                                                                                                                                                                                                                                                                                                                                          |
|-------------------|------------------------------------------|---------------------------------------------------------------------------------------------------------------------------------------------------------------------------------------------------------------------------------------------------------------------------------------------------------------------------------------------------------------------------------------------------------------------------------------------------------------------------------------------------------------------------------------------|
| Assay             | Type of assay                            | Cell-based luciferase reporter assay                                                                                                                                                                                                                                                                                                                                                                                                                                                                                                        |
|                   | Target                                   | NF- $\kappa$ B                                                                                                                                                                                                                                                                                                                                                                                                                                                                                                                              |
|                   | Primary measurement                      | Detection of luciferase activity                                                                                                                                                                                                                                                                                                                                                                                                                                                                                                            |
|                   | Key reagents                             | BC3 NF $\kappa$ B-luc #6 cells, BC3 NFRen- luc #3 cells, U251-pGL3 cells, Steady-Glo luciferase assay system, Dual-Glo luciferase assay system                                                                                                                                                                                                                                                                                                                                                                                              |
|                   | Assay protocol                           | Cells resuspended in media plated with compounds, cell lysis and luciferase assay at 24 hours                                                                                                                                                                                                                                                                                                                                                                                                                                               |
|                   | Additional comments                      |                                                                                                                                                                                                                                                                                                                                                                                                                                                                                                                                             |
| Library           | Library size                             | 1981                                                                                                                                                                                                                                                                                                                                                                                                                                                                                                                                        |
|                   | Library composition                      | The NCI Diversity Set was derived from the DTP small molecule library of over 140,000 compounds as a diverse set of representative compounds amenable to forming structure-based hypotheses.                                                                                                                                                                                                                                                                                                                                                |
|                   | Source                                   | NCI Diversity Set                                                                                                                                                                                                                                                                                                                                                                                                                                                                                                                           |
|                   | Additional comments                      |                                                                                                                                                                                                                                                                                                                                                                                                                                                                                                                                             |
| Screen            | Format                                   | 96-well plates at $7.5 \times 10^5$ cells/mL (BC3 NF $\kappa$ B-luc #6)                                                                                                                                                                                                                                                                                                                                                                                                                                                                     |
|                   | Concentration(s) tested                  | 5 $\mu$ M compound, 0.05% DMSO                                                                                                                                                                                                                                                                                                                                                                                                                                                                                                              |
|                   | Plate controls                           | No drug (0.05% DMSO-media only) treated cells and 0.05% DMSO media only (no cells)                                                                                                                                                                                                                                                                                                                                                                                                                                                          |
|                   | Reagent/ compound dispensing system      | Manual                                                                                                                                                                                                                                                                                                                                                                                                                                                                                                                                      |
|                   | Detection instrument and software        | Tecan GENios Pro; XFLUOR4GENIOSPRO V4.53                                                                                                                                                                                                                                                                                                                                                                                                                                                                                                    |
|                   | Assay validation/QC                      | Median Z' factor = 0.83 (range 0.52 – 0.92); Assay reproducibility $r^2=0.93$                                                                                                                                                                                                                                                                                                                                                                                                                                                               |
|                   | Correction factors                       | Plate background (media only)                                                                                                                                                                                                                                                                                                                                                                                                                                                                                                               |
|                   | Normalization                            | Percent Luc inhibition ( $=100 \times [1 - \text{RLU}_{\text{test compound}} / \text{RLU}_{\text{no drug control}}]$ )                                                                                                                                                                                                                                                                                                                                                                                                                      |
|                   | Additional comments                      |                                                                                                                                                                                                                                                                                                                                                                                                                                                                                                                                             |
| Post-HTS analysis | Hit criteria                             | 50% inhibition of luciferase in treated cells compared to control untreated cells                                                                                                                                                                                                                                                                                                                                                                                                                                                           |
|                   | Hit rate                                 | Primary screen 3%                                                                                                                                                                                                                                                                                                                                                                                                                                                                                                                           |
|                   | Additional assay(s)                      | Primary hit confirmation in BC3 NF $\kappa$ B-Luc#6 by cherry-picking from the Diversity Set compounds plate (98% confirmation rate); followed by dose-response testing of confirmed hits prepared from power samples for IC <sub>50</sub> determination in BC3 NF $\kappa$ B-luc#6, BC3 NFRen-luc #3 cells, and control U251-pGL3; 66 analogs of 3 primary hits from Phase I SAR study and 39 additional analogs from Phase II SAR study on the DTP Repository and ChemNavigator library were tested in BC3 NF $\kappa$ B-Ren-luc #3 cells |
|                   | Confirmation of hit purity and structure | Primary hits checked for purity by LC/MS; Primary lead compound (6-ETI) resynthesized (see Methods)                                                                                                                                                                                                                                                                                                                                                                                                                                         |

**Supplemental Table 2.** Hit compound IC<sub>50</sub>s in primary and secondary screens

| NSC#          | Structure                                                                           | Primary screen<br>(5μM)<br>% inhibition | IC <sub>50</sub> (Mean±SD, μM) |                        |                                             |               |           |
|---------------|-------------------------------------------------------------------------------------|-----------------------------------------|--------------------------------|------------------------|---------------------------------------------|---------------|-----------|
|               |                                                                                     |                                         | Dual reporter BC3NFκRen-luc#3  |                        |                                             | BC3NFκB-luc#6 | U251-pGL3 |
|               |                                                                                     |                                         | Firefly (NFκB)                 | Renilla (constitutive) | Mean IC <sub>50</sub> Renilla/Firefly ratio |               |           |
| <b>54044</b>  | 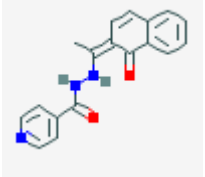   | 62.9                                    | 2.00±0.46                      | >20                    | >10                                         | 1.65          | >20       |
| 51355         |    | N/A                                     | 0.67±0.14                      | 10.03±0.64             | 15.0                                        | ND            | ND        |
| 27604         |   | N/A                                     | 1.06±0.07                      | >20                    | >18.9                                       | ND            | ND        |
| <b>111702</b> |  | 54.5                                    | 3.09±0.15                      | 8.25±2.18              | 2.7                                         | 2.74          | >20       |
| 39368         |  | N/A                                     | 0.27±0.01                      | 1.55±0.54              | 5.7                                         | ND            | ND        |
| <b>339908</b> |  | 55.4                                    | 0.25±0.03                      | >20                    | >80                                         | 4.5           | 3.69      |

Compounds in bold were identified in the primary screen. Compounds listed below primary hits are analogs of the respective compounds identified by re-screening. Abbreviations: N/A= not applicable, ND= not determined; Structures: Grey=H, Blue=N, Red=O, Green=Cl, Yellow=S



**Supplementary Table 3.** Examination of reads mapping to adenosine kinase (ADK) gene

| EXON:            | Start    | End                | Length | Number of reads in cell line |        |         |         |         |        |         |        |        |
|------------------|----------|--------------------|--------|------------------------------|--------|---------|---------|---------|--------|---------|--------|--------|
|                  |          |                    |        | BC3 #1                       | BC3 #2 | *2-3low | ◆3-5low | ♥NSCE-1 | NSCE-2 | *NSCE-3 | NSCE-6 | NSCE-7 |
| ENSE00002319053  | 75910960 | 75911101           | 141    | 31                           | 26     | 3       | 59      | 28      | 53     | 1       | 38     | 54     |
| ENSE00001873962  | 75934174 | 75934376           | 202    | 6                            | 6      | 1       | 0       | 3       | 3      | 2       | 5      | 2      |
| ENSE00001458497  | 75936444 | 75936644           | 200    | 129                          | 125    | 12      | 100     | 54      | 252    | 7       | 180    | 276    |
| ENSE00003178627  | 75960522 | 75960596           | 74     | 110                          | 123    | 10      | 103     | 74      | 226    | 3       | 176    | 274    |
| ENSE00003157632  | 75984296 | 75984349           | 53     | 70                           | 54     | 6       | 55      | 40      | 101    | 2       | 90     | 147    |
| ENSE00001178540  | 76074425 | 76074503           | 78     | 170                          | 174    | 5       | 157     | 96      | 314    | 8       | 296    | 397    |
| ENSE00001024568  | 76153899 | 76154071           | 172    | 432                          | 405    | 24      | 327     | 275     | 267    | 22      | 264    | ♣1     |
| ENSE00001024570  | 76158229 | 76158337           | 108    | 250                          | 259    | 22      | 213     | 144     | 179    | 15      | 172    | ♣0     |
| ◆ENSE00001310865 | 76285014 | 76285184           | 170    | 442                          | 448    | 37      | 428     | 264     | 270    | 25      | 255    | ♣0     |
| ENSE00001910381  | 76287518 | 76288057           | 539    | 14                           | 13     | 0       | 17      | 7       | 2      | 1       | 3      | ♣0     |
| ♥ENSE00001248835 | 76349040 | 76349075           | 35     | 14                           | 17     | 3       | 30      | 18      | ♣0     | 4       | ♣0     | ♣0     |
| ENSE00001248829  | 76360137 | 76360251           | 114    | 361                          | 345    | 48      | 358     | 210     | ♣0     | 33      | ♣0     | ♣0     |
| ENSE00001248825  | 76429941 | 76430027           | 86     | 214                          | 211    | 16      | 210     | 135     | 413    | 15      | 341    | 492    |
| ENSE00001390313  | 76468079 | 76469061           | 982    | 811                          | 770    | 84      | 945     | 508     | 1585   | 36      | 1317   | 1894   |
|                  |          | <b>Total Reads</b> |        | 3054                         | 2976   | 271     | 3002    | 1856    | 3665   | 174     | 3137   | 3537   |

The number of reads mapping to fourteen individual exons of the ADK gene in two control parental BC3 (bold), and seven 6-ETI resistant cell lines is shown. Table indicates start and end positions, as well as length of each exon. All resistant cell lines harbor modifications, including nonsynonymous mutations (G239E in 3-5low and E243K in NSCE-1), underexpression (2-3low and NSCE-3), and exon loss (NSCE-2, NSCE-6, and NSCE-7). Key: \*Sample with under-expression; ◆Exon / sample containing the G239E variant; ♥Exon / sample containing the E243K variant; ♣Exon lost.

**Supplemental Table 4.** Pathways enriched by expression analysis on transcriptome sequencing data

| <b>Ingenuity Canonical Pathways</b>                 | <b>-log(p-value)</b> |
|-----------------------------------------------------|----------------------|
| Protein Ubiquitination Pathway                      | 1.57E01              |
| NRF2-mediated Oxidative Stress Response             | 6.17E00              |
| Glucocorticoid Receptor Signaling                   | 6.03E00              |
| Prostate Cancer Signaling                           | 5.81E00              |
| Aryl Hydrocarbon Receptor Signaling                 | 5.26E00              |
| Antigen Presentation Pathway                        | 4.35E00              |
| Aldosterone Signaling in Epithelial Cells           | 4.07E00              |
| Estrogen Receptor Signaling                         | 4.03E00              |
| Hypoxia Signaling in the Cardiovascular System      | 3.9E00               |
| Androgen Signaling                                  | 3.81E00              |
| PPAR $\alpha$ /RXR $\alpha$ Activation              | 3.73E00              |
| PPAR Signaling                                      | 3.69E00              |
| Telomerase Signaling                                | 3.5E00               |
| PI3K/AKT Signaling                                  | 3.49E00              |
| eNOS Signaling                                      | 3.15E00              |
| Mitotic Roles of Polo-Like Kinase                   | 3.05E00              |
| Spermidine Biosynthesis I                           | 3.03E00              |
| S-adenosyl-L-methionine Biosynthesis                | 3.03E00              |
| iNOS Signaling                                      | 3.02E00              |
| LXR/RXR Activation                                  | 2.83E00              |
| VDR/RXR Activation                                  | 2.6E00               |
| Methionine Degradation I (to Homocysteine)          | 2.58E00              |
| Cysteine Biosynthesis III (mammalia)                | 2.42E00              |
| TR/RXR Activation                                   | 2.38E00              |
| Neuregulin Signaling                                | 2.36E00              |
| Cell Cycle: G1/S Checkpoint Regulation              | 2.28E00              |
| Endoplasmic Reticulum Stress Pathway                | 2.23E00              |
| Chronic Myeloid Leukemia Signaling                  | 2.22E00              |
| Xenobiotic Metabolism Signaling                     | 2.19E00              |
| Polyamine Regulation in Colon Cancer                | 2.17E00              |
| Huntington's Disease Signaling                      | 2.12E00              |
| Role of JAK1, JAK2 and TYK2 in Interferon Signaling | 2.06E00              |
| Primary Immunodeficiency Signaling                  | 2.05E00              |
| JAK/Stat Signaling                                  | 2.03E00              |
| Gluconeogenesis I                                   | 2.01E00              |
| Cell Cycle: G2/M DNA Damage Checkpoint Regulation   | 1.95E00              |
| Superpathway of Cholesterol Biosynthesis            | 1.92E00              |
| Amyloid Processing                                  | 1.92E00              |
| Cyclins and Cell Cycle Regulation                   | 1.92E00              |
| EIF2 Signaling                                      | 1.91E00              |
| RAR Activation                                      | 1.9E00               |
| Hereditary Breast Cancer Signaling                  | 1.82E00              |
| Purine Nucleotides De Novo Biosynthesis II          | 1.8E00               |
| Superpathway of Methionine Degradation              | 1.76E00              |

|                                                           |         |
|-----------------------------------------------------------|---------|
| P2Y Purigenic Receptor Signaling Pathway                  | 1.72E00 |
| Chondroitin Sulfate Degradation (Metazoa)                 | 1.66E00 |
| Cholesterol Biosynthesis I                                | 1.66E00 |
| Cholesterol Biosynthesis II (via 24,25-dihydrolanosterol) | 1.66E00 |
| Cholesterol Biosynthesis III (via Desmosterol)            | 1.66E00 |
| Oncostatin M Signaling                                    | 1.65E00 |
| Stearate Biosynthesis I (Animals)                         | 1.65E00 |
| Role of BRCA1 in DNA Damage Response                      | 1.63E00 |
| Dermatan Sulfate Degradation (Metazoa)                    | 1.6E00  |
| ERK5 Signaling                                            | 1.59E00 |
| Interferon Signaling                                      | 1.59E00 |
| Nitric Oxide Signaling in the Cardiovascular System       | 1.56E00 |
| Molecular Mechanisms of Cancer                            | 1.55E00 |
| tRNA Charging                                             | 1.52E00 |
| Granzyme B Signaling                                      | 1.49E00 |
| Melatonin Signaling                                       | 1.48E00 |
| Epoxysqualene Biosynthesis                                | 1.45E00 |
| Spermine Biosynthesis                                     | 1.45E00 |
| Palmitate Biosynthesis I (Animals)                        | 1.45E00 |
| Fatty Acid Biosynthesis Initiation II                     | 1.45E00 |
| Putrescine Biosynthesis III                               | 1.45E00 |
| Glycine Biosynthesis I                                    | 1.45E00 |
| Glutamine Degradation I                                   | 1.45E00 |
| Granzyme A Signaling                                      | 1.44E00 |
| Role of IL-17F in Allergic Inflammatory Airway Diseases   | 1.44E00 |
| FLT3 Signaling in Hematopoietic Progenitor Cells          | 1.42E00 |
| Role of NFAT in Cardiac Hypertrophy                       | 1.41E00 |
| Pancreatic Adenocarcinoma Signaling                       | 1.38E00 |
| Prolactin Signaling                                       | 1.38E00 |
| Regulation of eIF4 and p70S6K Signaling                   | 1.38E00 |
| fMLP Signaling in Neutrophils                             | 1.37E00 |
| Corticotropin Releasing Hormone Signaling                 | 1.36E00 |
| GADD45 Signaling                                          | 1.35E00 |
| Purine Nucleotides Degradation II (Aerobic)               | 1.35E00 |
| PDGF Signaling                                            | 1.31E00 |
| DNA Methylation and Transcriptional Repression Signaling  | 1.31E00 |

Ingenuity Pathway Analysis software was used to analyze gene expression changes from RNASeq of 6-ETI-resistant clones. Results are presented as a list of enriched pathways meeting a cutoff p-value of  $\leq 0.05$ .

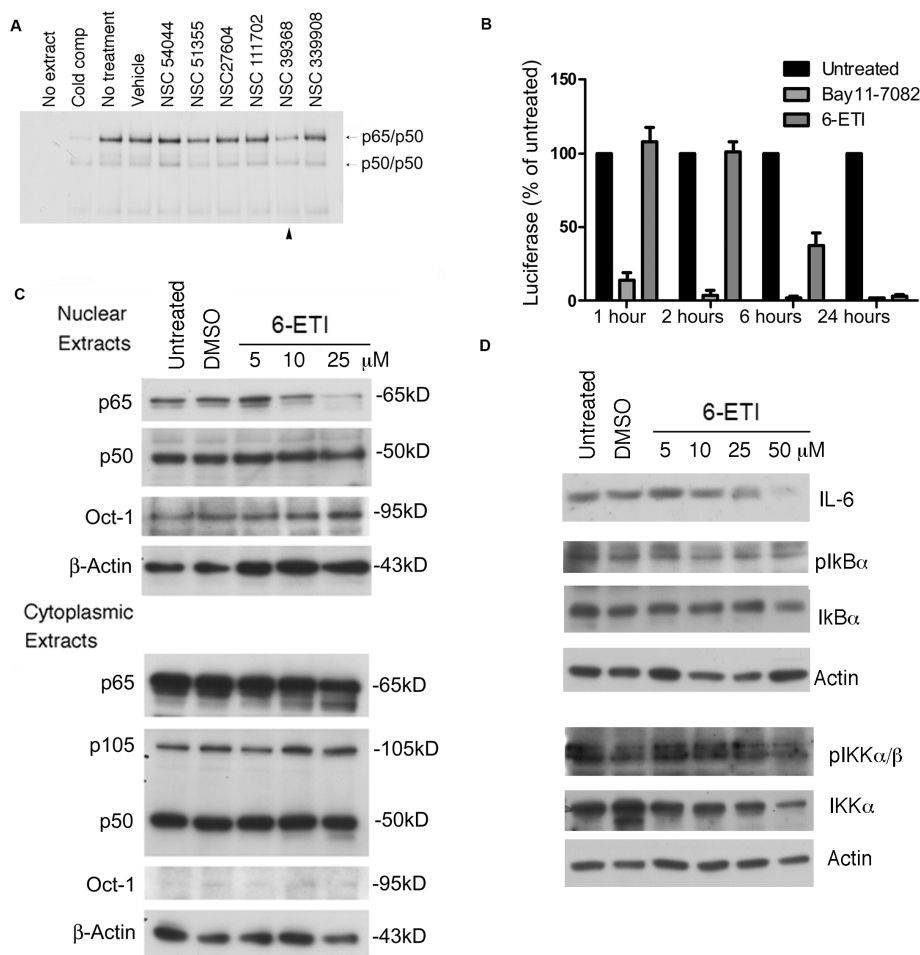

**Supplemental Figure 1. 6-Ethylthioinosine is selective to PEL cells.** **(A)** Nuclear extracts from BC3 cells treated for 24 hours with 25μM of the indicated hit compounds were analyzed by EMSA for binding to an NF-κB response element. Control lanes include no compound, competition with cold probe, untreated and DMSO-treated samples. Experiment was performed three separate times. A representative blot is shown. **(B)** BC3 NFκB-luc#6 cells were plated at  $5 \times 10^5$  cells/ml in RPMI with 15% FBS, treated with 10μM NF-κB inhibitor Bay11-7082 or 50μM NSC39368 (6-ETI). At the indicated time points, cells were lysed and analyzed by the Luciferase Assay System. Luciferase activity was normalized to untreated cells at each time point, and plotted using GraphPad Prism. Graph represents the mean±SEM of three independent experiments. **(C)** Nuclear and cytoplasmic extracts from BC3 cells treated for 24 hours with the indicated doses of 6-ETI were analyzed by western blotting for NF-κB components p65 and p50, as well as a control transcription factor Oct-1. Actin was used as a loading control, and a representative blot is shown from three independent experiments. **(D)** Whole cell extracts obtained from BC3 cells treated at the indicated concentrations of 6-ETI for 24 hours were analyzed by western blotting for upstream NF-κB pathway components phospho- and total IκBα, phospho-IKKα/β, and total IKKα. Actin served as the loading control, and a representative blot of at least three independent experiments is shown.

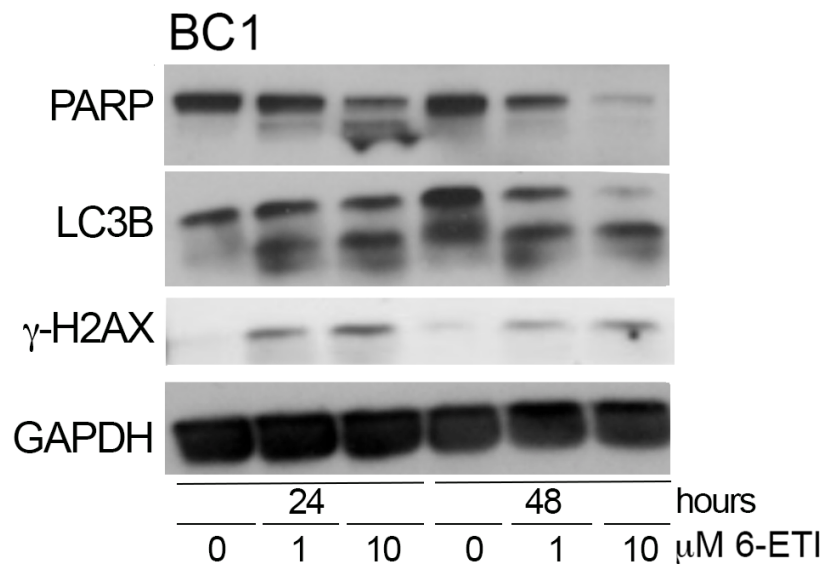

**Supplemental Figure 2. Mechanism of 6-ETI induced cell death in the BC1 PEL cell line.**

BC1 cells treated with the indicated doses of 6-ETI at the shown time points were analyzed by western blotting on whole cell extracts for PARP cleavage as an indicator of apoptotic induction and for LC3B cleavage as an indicator of autophagosome formation. Immunoblotting for  $\gamma$ H2AX is shown after treatment with 6-ETI at the indicated time points and doses. GAPDH was used as loading control.

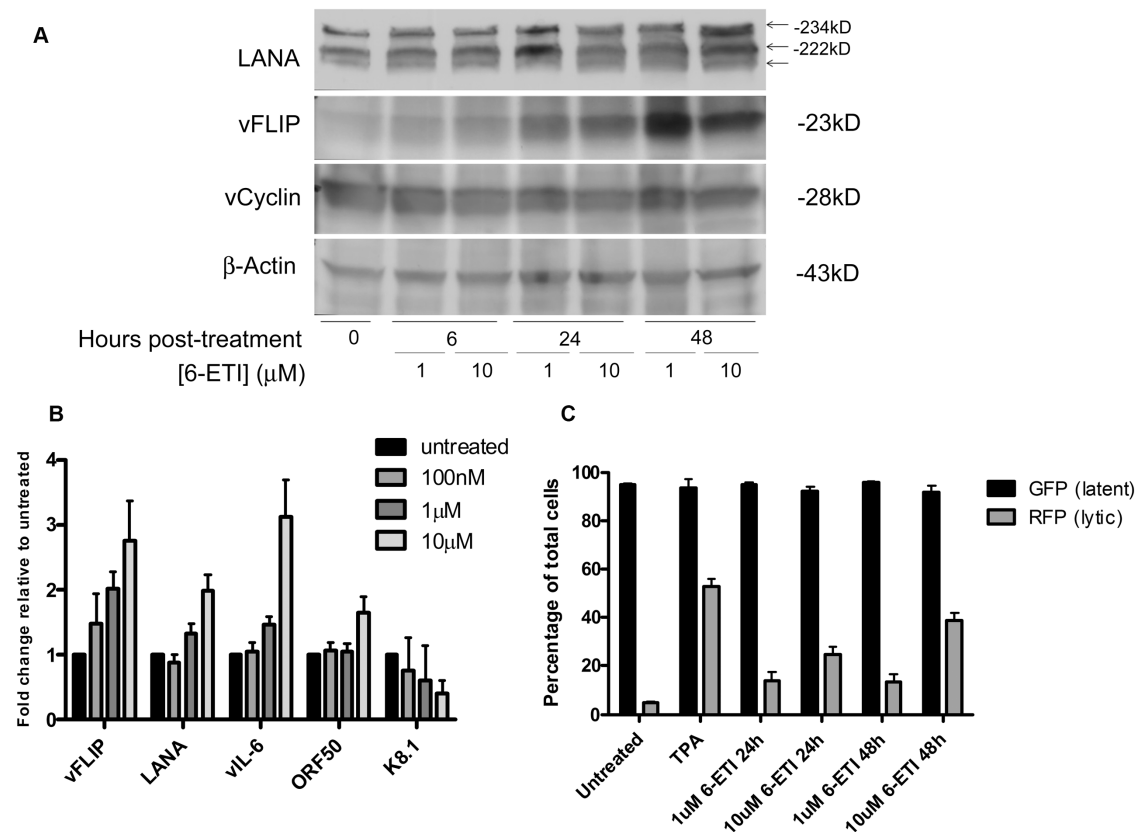

**Supplemental Figure 3. Effect of 6-ETI on KSHV latent and lytic genes. (A)** BC3 cells treated for the indicated time points at two different doses of 6-ETI were analyzed by western blotting on whole cell extracts for KSHV latent proteins LANA, vFLIP, and vCyclin. Results shown are representative of at least three independent experiments. **(B)** RNA was extracted from BC3 cells treated for 24 hours at three different doses of 6-ETI, followed by qPCR analysis for selected KSHV latent and lytic genes. Results analyzed using the  $\Delta\Delta C_t$  method were plotted as fold changes in expression relative to untreated cells. The graph is mean $\pm$ SEM and representative of at least three independent experiments. **(C)** JSC1 B3.1 cells treated with the lytic inducer TPA (20ng/mL for 48 hours) or 1 or 10 μM 6-ETI were analyzed by two-color flow for GFP (latent) or RFP (lytic) expression at 24 or 48 hours after treatment as indicated. Results represent the mean $\pm$ SEM of three independent repeats.

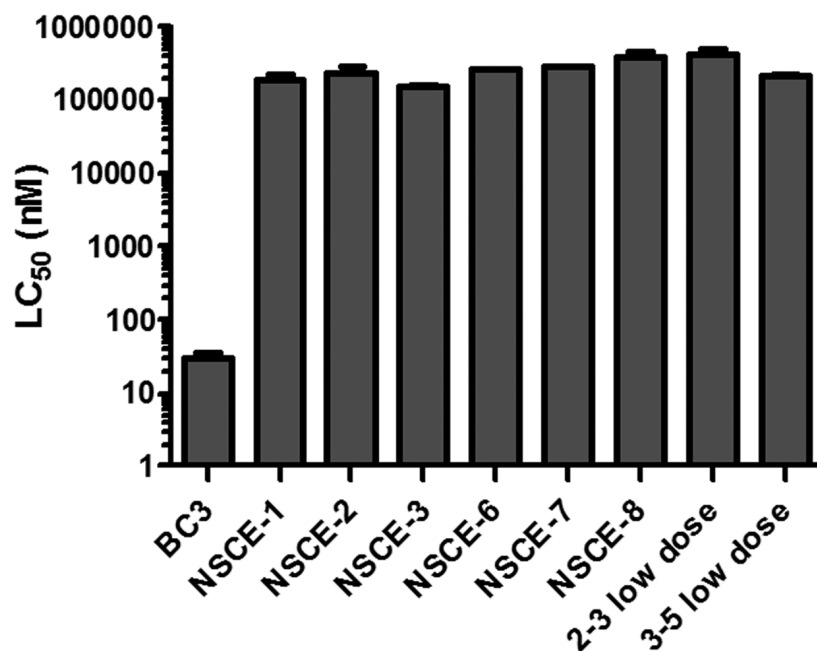

**Supplemental Figure 4: Generation of 6-Ethylthioinosine resistant cell lines.** 6-ETI resistant cell lines generated by growing BC3 cells under increasing doses of 6-ETI in multiwall plates were tested for 6-ETI resistance using a compound viability dose curve, with LC<sub>50</sub>s determined by online EC<sub>50</sub> software through the use of the Cell Titer-Glo ATP content assay at 48 hours. Results presented are the mean±SEM of at least three independent experiments.

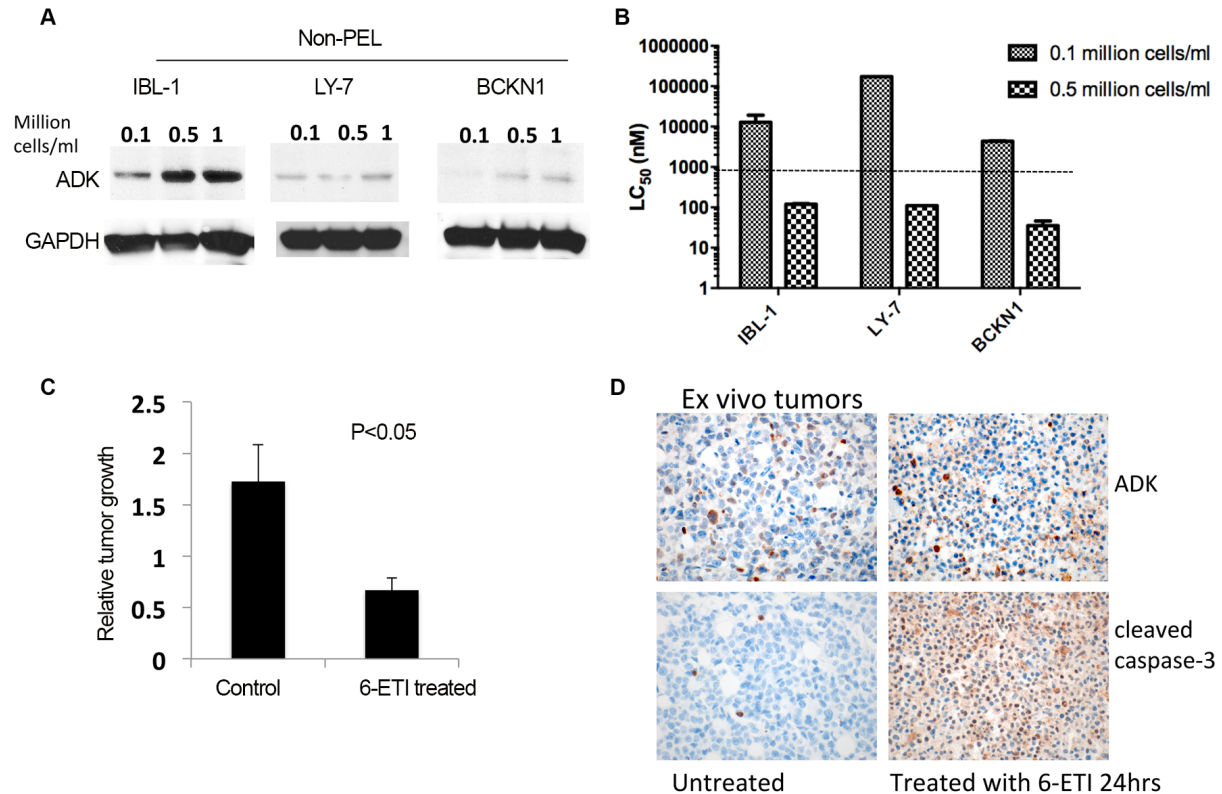

**Supplemental Figure 5. Adenosine kinase levels determine lymphoma sensitivity to 6-ETI.** **(A)** Three 6-ETI-resistant lymphoma cell lines (IBL1, LY7 and BCKN1) were grown at various plating densities as indicated. Whole cell extracts obtained at 24 hours were examined by western blotting for ADK levels, and GAPDH was used as a loading control. A representative blot of three independent experiments is shown. **(B)** Three 6-ETI-resistant lymphoma cell lines (IBL1, LY7 and BCKN1) were plated at 1 or 4\*10<sup>5</sup> cells/mL in RPMI with 20% FBS, followed by treatment with 6-ETI at several doses for 48 hours. LC<sub>50</sub>s were determined through online EC<sub>50</sub> software, on the basis of CellTiter-Glo luciferase assay. Results shown are mean±SEM of three independent experiments. **(C)** Tumor growth in three IBL1 xenografted mice treated with 6-ETI compared to three vehicle control mice; results were analyzed by t-test (p<0.05). **(D)** Xenograft tumors from control and treated mice stained by immunohistochemistry with ADK and cleaved caspase 3 antibodies *ex vivo*. Original magnification is 60X.



## Multiple Myeloma

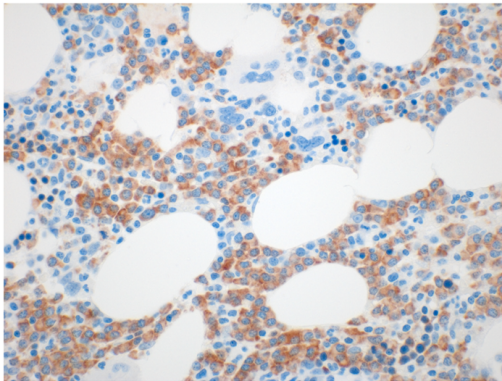

Patient 2

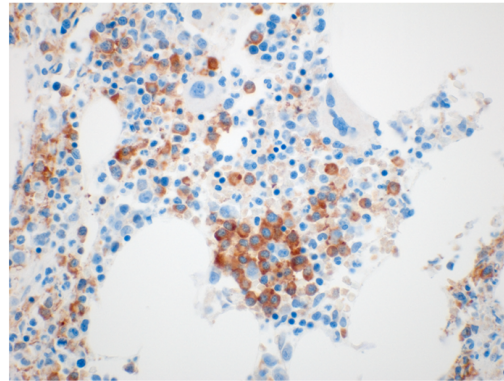

Patient 3

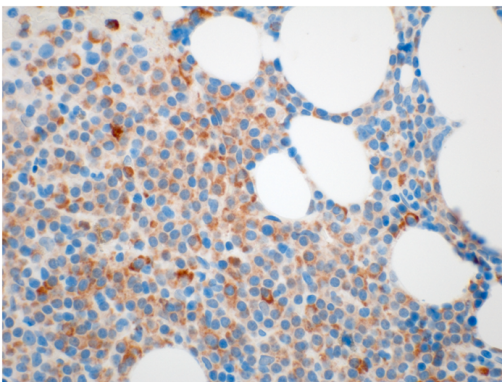

Patient 4

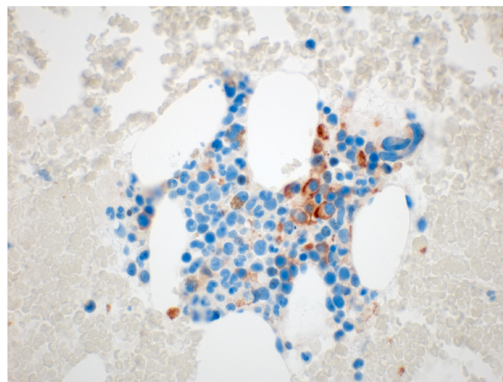

Patient 5

## Uninvolved bone marrow

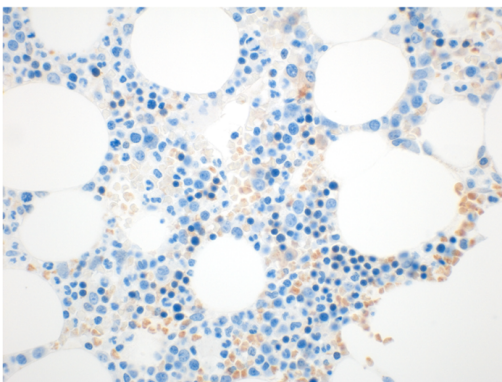

## Plasmablastic lymphoma

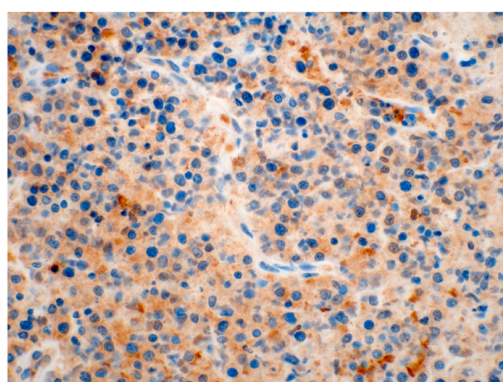

Patient 2

**Supplemental Figure 6. ADK expression in primary multiple myeloma and plasmablastic lymphoma patient specimens.** Immunohistochemistry staining for ADK expression in four multiple myeloma samples, and additional plasmablastic lymphoma patient sample showing high levels of ADK expression in comparison to non-involved bone marrow (original magnification: 60X).

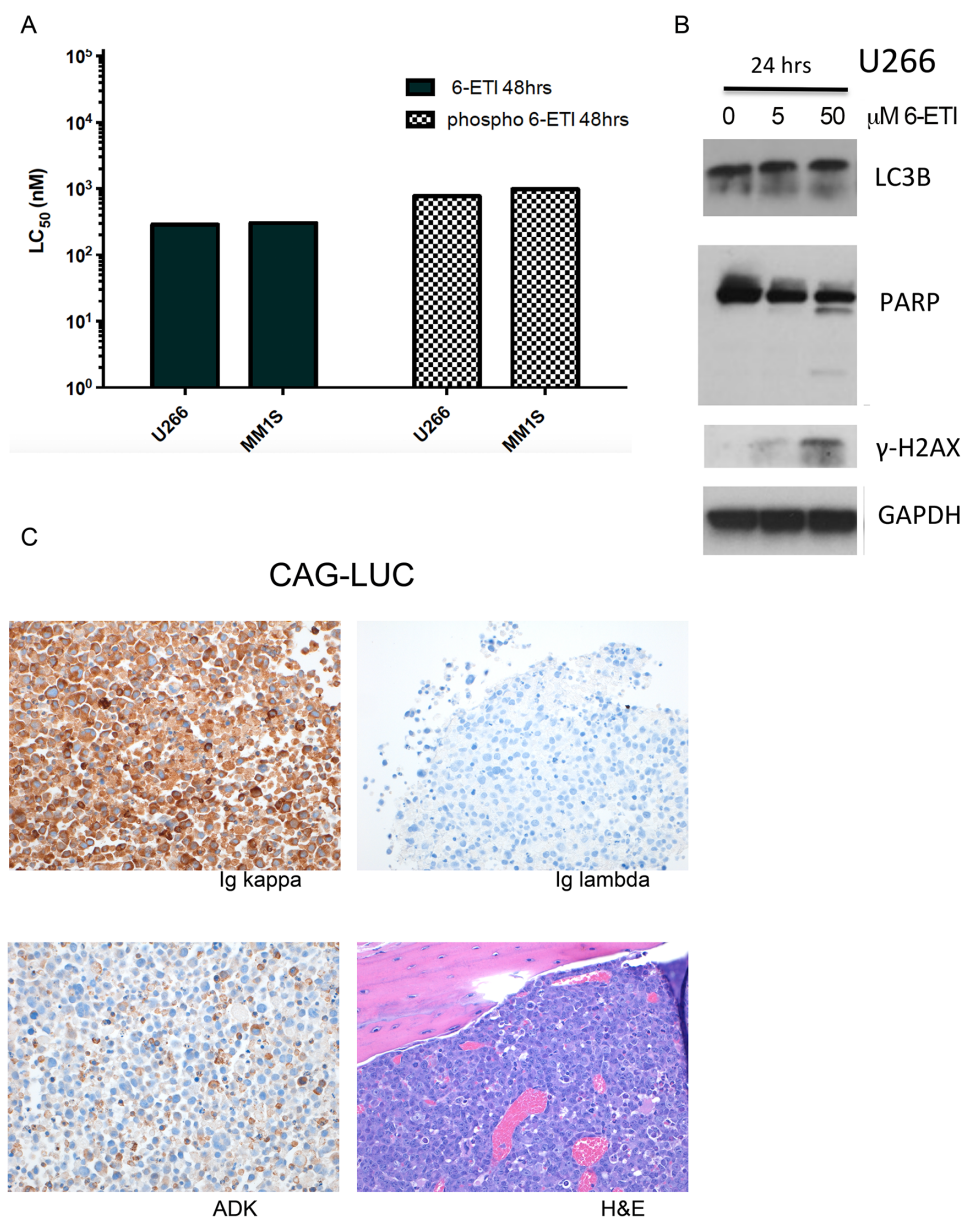

**Supplemental Figure 7. Characterization of multiple myeloma.** **(A)** Response of multiple myeloma cell lines U266 and MM1S to 6-ETI and phospho-6-ETI at 48hrs post-treatment. Results are mean $\pm$ SEM of three independent experiments **(B)** U266 cells were treated with the indicated doses of 6-ETI at the shown time points. Cell lysates were subjected to western immunoblotting to detect LC3B cleavage, PARP and its cleaved form, and phosphorylated H2AX ( $\gamma$ -H2AX) as a marker of DNA damage response. Western blot shown is representative of three independent experiments. **(C)** Prior to injection into mice, CAG-luc cells were confirmed to express cytoplasmic immunoglobulin, as expected for a MM, and to be monotypic for kappa light chains. ADK expression was confirmed by IHC. The lower right panel shows localization to the bone marrow when injected into NOD-SCID mice (original magnification: 60X).
